# Supplementary material for: Antimicrobial and Immunomodulatory Activity of Herb Extracts Used in Burn Wound Healing: “San Huang Powder”
Source: PubMed Central journal article supplement (PMC8526243; doi:10.1155/2021/2900060), 2021-10-12
Supplement: 2900060.f1.pdf [file 2900060.f1.pdf]

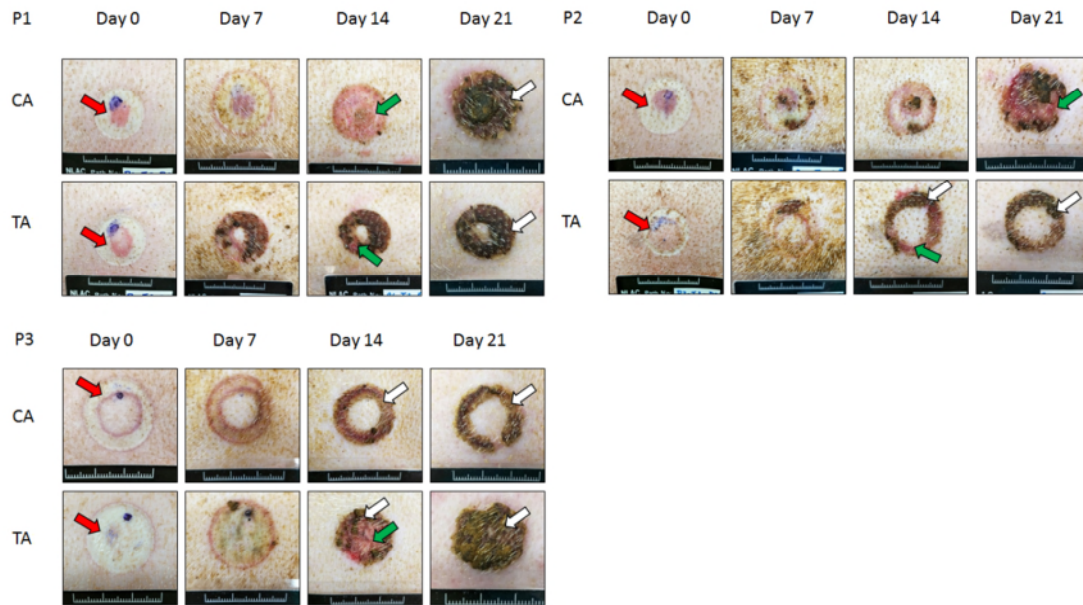

**Figure S1. Representative photomicrographs showing the time course of wound healing on days 0, 7, 14, and 21. Red arrow: ischemic necrosis; green arrow: new pinkish granulation tissue; white arrow: crusted skin mixed with exudate and herbal materials.**
